# Supplementary material
Source: HighWire-hosted journal article supplement (http://jpet.aspetjournals.org/highwire/filestream/136641/field_highwire_adjunct_files/0/227066_suppl_fig_1.pdf)
Supplement: 227066_suppl_fig_1.pdf [file 227066_suppl_fig_1.pdf]

**Supplemental Data**

New multi-target antagonists of  $\alpha_{1A}$ -,  $\alpha_{1D}$ -adrenoceptors and 5-HT<sub>1A</sub> receptors reduce human hyperplastic prostate cell growth and the increase of intraurethral pressure

Jéssica B Nascimento-Viana, Aline R Carvalho, Luiz Eurico Nasciutti, Rocío Alcántara-Hernández, Fernanda Chagas-Silva, Pedro A R Souza, Luiz Antônio S Romeiro, J Adolfo García-Sáinz, François Noël, and Claudia Lucia Martins Silva

Journal of Pharmacology and Experimental Therapeutics

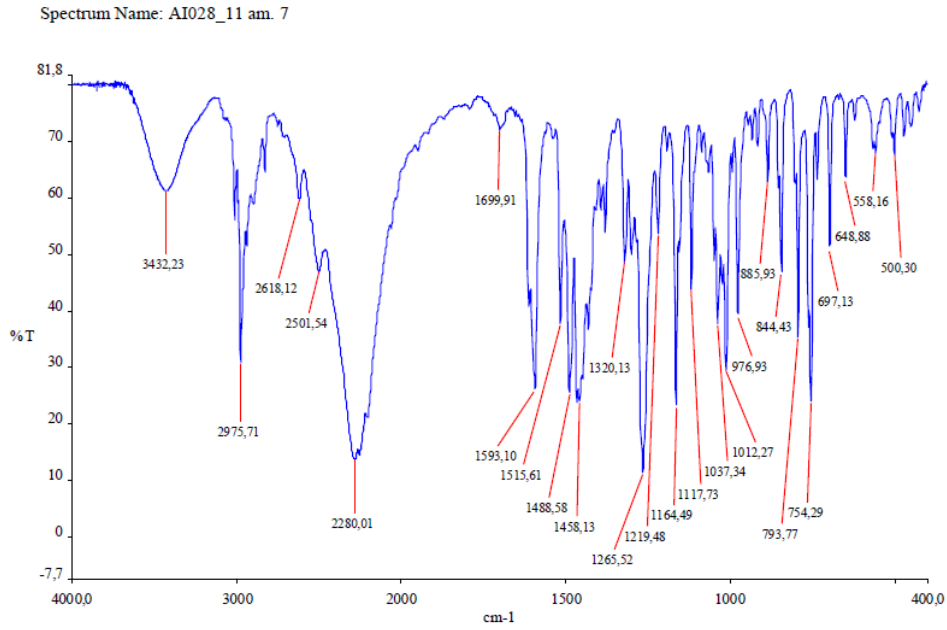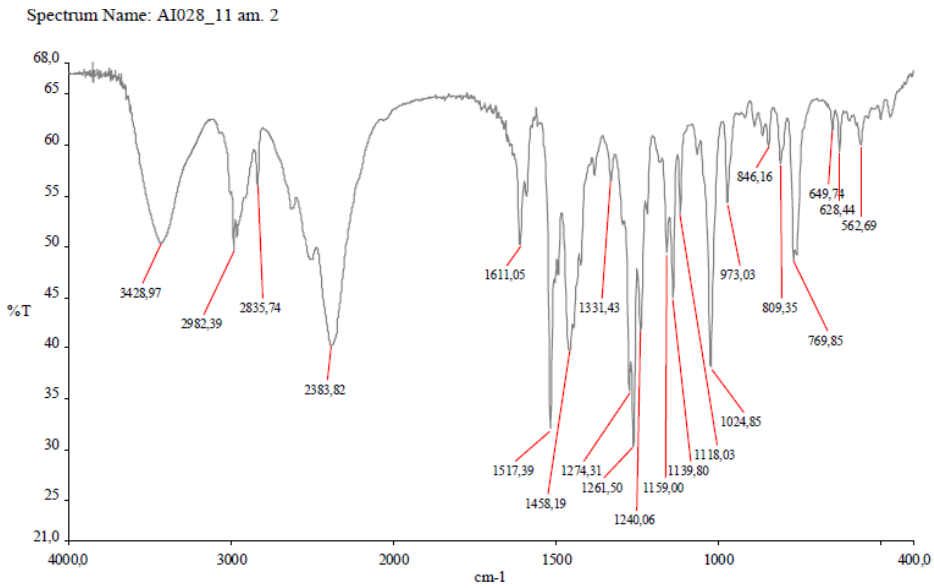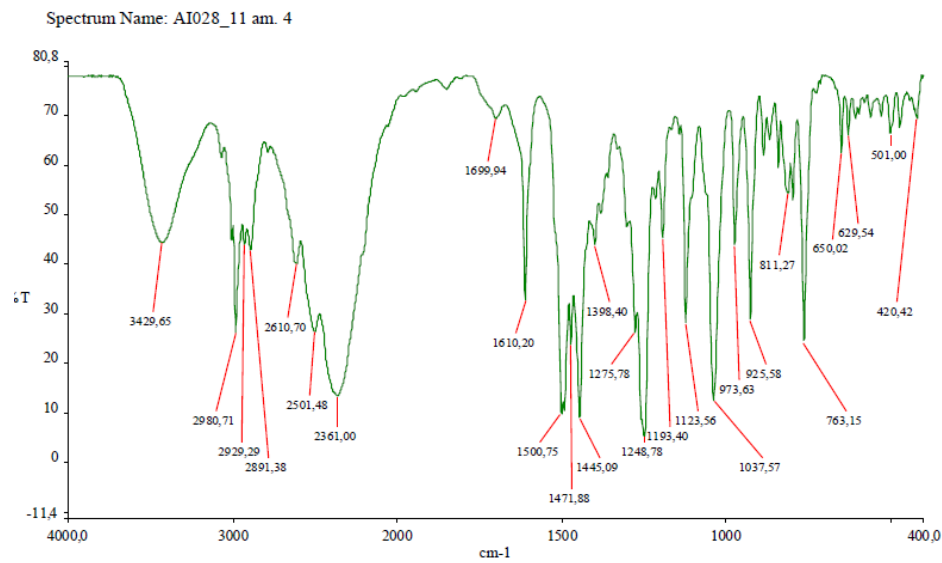

Supplemental Figure 1. Fourier transform infrared spectroscopy of LDT3 (upper), LDT5 (middle) and LDT8 (lower spectrum).
